# Supplementary material for: Comparison of the specificity of antibodies to VAR2CSA in Cameroonian multigravidae with and without placental malaria: a retrospective case–control study
Source: PubMed Central journal article supplement (PMC4666123; doi:10.1186/s12936-015-1023-6), 2015-12-01

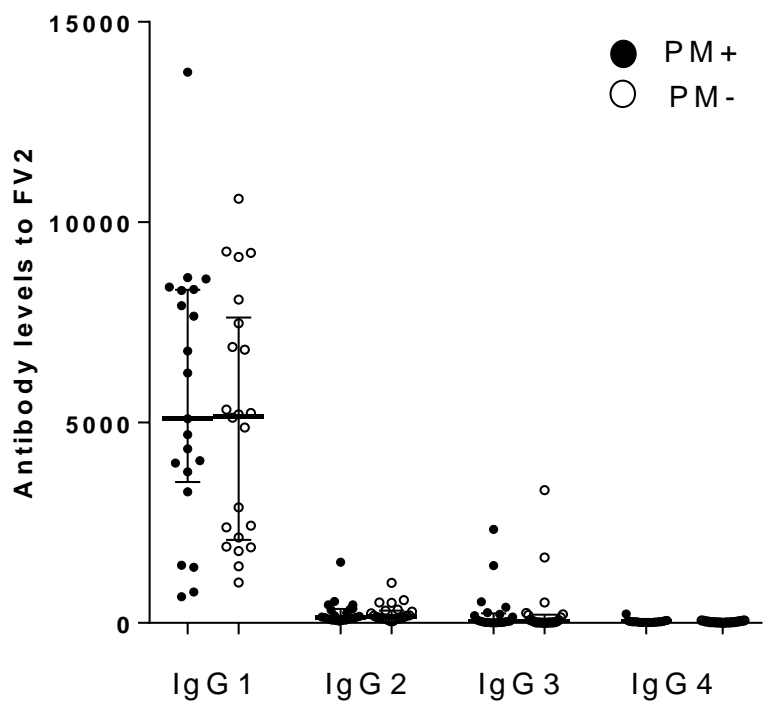

Supplement: 12936_2015_1023_MOESM3_ESM.pdf [file 12936_2015_1023_MOESM3_ESM.pdf]
