# Supplementary material for: Comparison of the specificity of antibodies to VAR2CSA in Cameroonian multigravidae with and without placental malaria: a retrospective case–control study
Source: Malar J. 2015 Dec 1;14:480. doi: 10.1186/s12936-015-1023-6 (PMC4666123; doi:10.1186/s12936-015-1023-6)
Supplement: Supplementary file 1 — 10.1186/s12936-015-1023-6 Cut-off values for DBL domains and FV2. [file 12936_2015_1023_MOESM1_ESM.xlsx]

## Sheet: Sheet1
Additional file 1. Cut-off values for DBL domains and FV2
Antigen	Cut-off value (MFI)*
DBL1 3D7	3461
DBL1 7G8	8699
DBL1+2 FCR3	2384
DBL2 FCR3	2929
DBL3 7G8	4422
DBL3 A4 FCR3	4727
DBL3 FCR3	2542
DBL4 7G8	1399
DBL4 FCR3	5135
DBL4 IT4	4265
DBL5 3D7	4764
DBL5 7G8	3003
DBL5 FCR3	3309
DBL6 7G8	6387
DBL6 FCR3	4743
DBL6 IT4	5284
FV2 FCR3	2326
*Based on Cameroonian male mean + 2SD
