# Supplementary material for: Comparison of the specificity of antibodies to VAR2CSA in Cameroonian multigravidae with and without placental malaria: a retrospective case–control study
Source: Malar J. 2015 Dec 1;14:480. doi: 10.1186/s12936-015-1023-6 (PMC4666123; doi:10.1186/s12936-015-1023-6)
Supplement: Supplementary file 2 — 10.1186/s12936-015-1023-6 Testing mouse anti-human monoclonal antibodies for cross-reactivity (median fluorescent intensities tabulated). [file 12936_2015_1023_MOESM2_ESM.xlsx]

## Sheet: Sheet1
Additional file 2. Testing mouse anti-human monoclonal antibodies for cross-reactivity (median fluorescent intensities tabulated)
	hu IgG1 beads	hu IgG2 beads	hu IgG3 beads	hu IgG4 beads
PBS 1% BSA control	199	104	92	120
mouse anti-hu-IgG1 1:2000	13306	172	142	1403
mouse anti-hu-IgG1 1:4000	12532	144	122	906
mouse anti-hu-IgG2 1:1000	143	14699	121	142
mouse anti-hu-IgG2 1:2000	245	14456	129	158
mouse anti-hu-IgG3 1:1000	148	112	12949	46
mouse anti-hu-IgG3 1:2000	142	115	12167	42
mouse anti-hu-IgG4 1:1000	201	147	367	8937
mouse anti-hu-IgG4 1:2000	148	156	293	8743
